# Supplementary material for: Human intestinal stromal cells promote homeostasis in normal mucosa but inflammation in Crohn’s disease in a retinoic acid–deficient manner
Source: PubMed Central journal article supplement — Mucosal Immunol. Author manuscript; Available in PMC 2024 Nov 2. (PMC11530961; doi:10.1016/j.mucimm.2024.06.009), 2024-06-28
Supplement: NIHMS2028720-supplement-1.pdf [file NIHMS2028720-supplement-1.pdf]

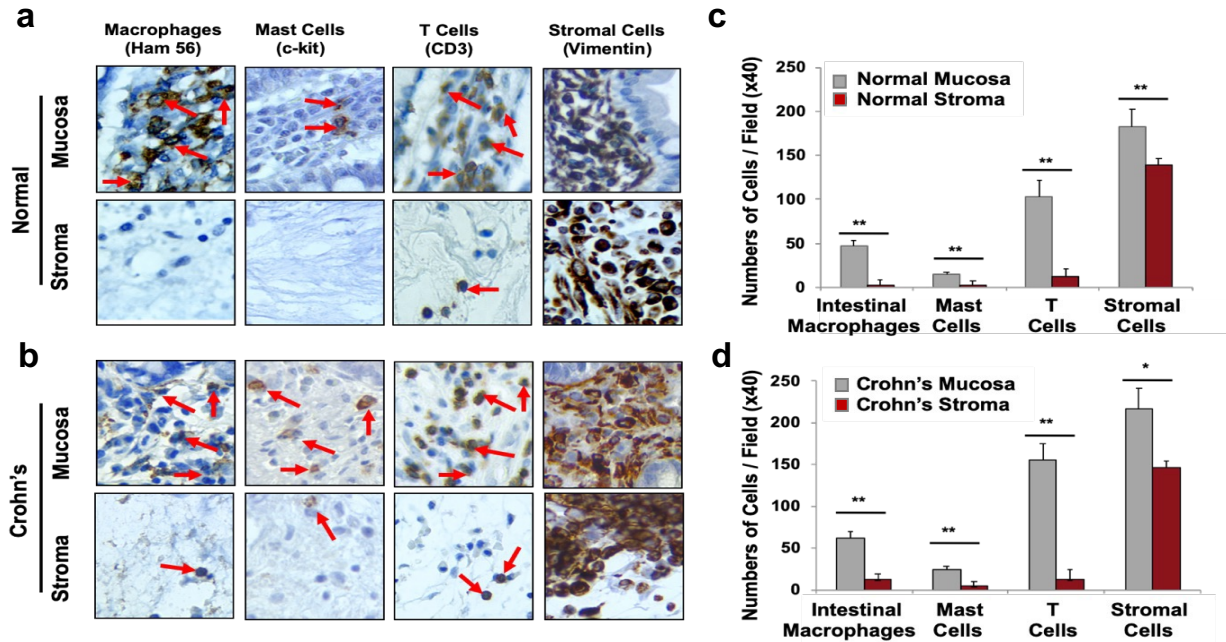

**Supplementary Figure 1. Stromal cells are the predominant cell in the ileal mucosa.** Tissue sections of **a** normal and **b** Crohn's disease ileal mucosa and (donor-matched) stroma (n=5) stained for intestinal macrophages (HAM56<sup>+</sup>/DAB<sup>+</sup>), mast cells (Ckit<sup>+</sup>/DAB<sup>+</sup>), CD4<sup>+</sup> T cells (CD4<sup>+</sup>/DAB<sup>+</sup>) and SCs (vimentin<sup>+</sup>/DAB<sup>+</sup>) and analyzed by IHC (40X). Numbers of intestinal macrophages, mast cells, CD4<sup>+</sup> T cells and SCs present in 10 randomly selected fields/section of **c** normal mucosa and stroma and **d** Crohn's disease mucosa and stroma (n=4).

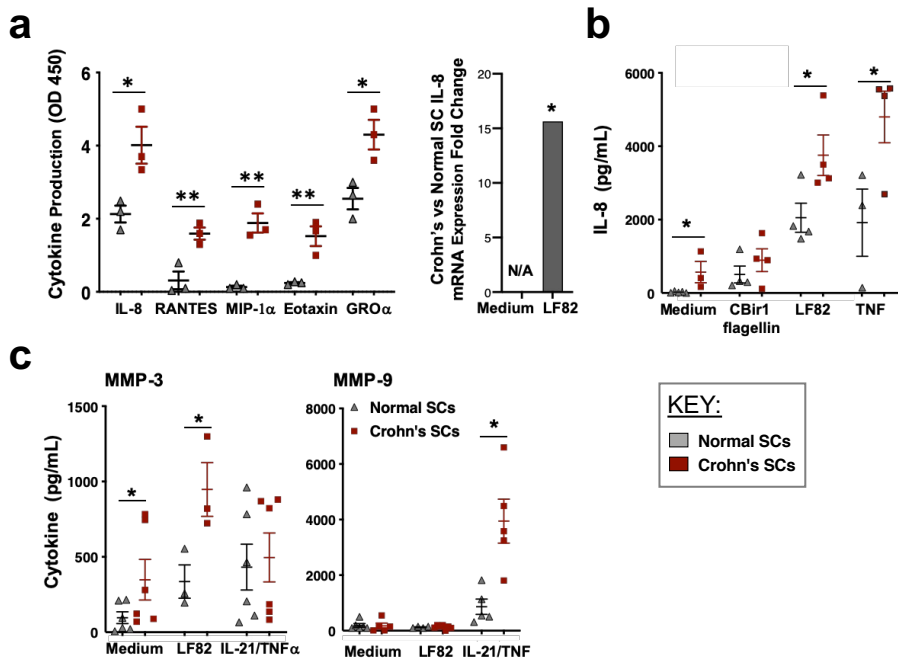

**d**

| INFLAMMATORY RESPONSE |                                                  | UNSTIMULATED CROHN'S SCS vs NORMAL SCS |         | STIMULATED CROHN'S SCS vs NORMAL SCS |         |
|-----------------------|--------------------------------------------------|----------------------------------------|---------|--------------------------------------|---------|
| Symbol                | Gene                                             | Fold Change                            | P value | Fold Change                          | P value |
| TREM1                 | triggering receptor expressed on myeloid cells 1 | 1.355                                  | 0.904   | 458723.462                           | 0.000   |
| IL1RN                 | interleukin 1 receptor antagonist                | 15.977                                 | 0.049   | 1331.891                             | 0.000   |
| CSF3                  | colony stimulating factor 3                      | 58.026                                 | 0.016   | 819.796                              | 0.001   |
| CCL3L1                | C-C motif chemokine ligand 3 like 1              | 1.280                                  | 0.834   | 375.948                              | 0.000   |
| IL1B                  | interleukin 1 beta                               | 23.453                                 | 0.001   | 234.135                              | 0.000   |
| CCL20                 | C-C motif chemokine ligand 20                    | 1.542                                  | 0.775   | 80.658                               | 0.032   |
| CXCL11                | C-X-C motif chemokine ligand 11                  | -13.153                                | 0.024   | 69.363                               | 0.006   |
| IL1A                  | interleukin 1 alpha                              | 25.799                                 | 0.001   | 64.123                               | 0.001   |
| TLR2                  | toll like receptor 2                             | 5.084                                  | 0.067   | 53.203                               | 0.001   |
| TLR4                  | toll like receptor 4                             | 2.035                                  | 0.368   | 42.512                               | 0.001   |
| IDO1                  | indoleamine 2,3-dioxygenase 1                    | -18.875                                | 0.052   | 42.349                               | 0.068   |
| IL6                   | interleukin 6                                    | 12.504                                 | 0.007   | 40.710                               | 0.003   |
| IL11                  | interleukin 11                                   | 5.421                                  | 0.052   | 15.806                               | 0.020   |
| CSF2                  | colony stimulating factor 2                      | 1.613                                  | 0.694   | 13.965                               | 0.107   |
| NFKBIZ                | NFKB inhibitor zeta                              | 1.915                                  | 0.187   | 6.630                                | 0.005   |
| ICAM1                 | intercellular adhesion molecule 1                | 3.476                                  | 0.039   | 5.701                                | 0.034   |
| NFKB1                 | NFKB-p105                                        | -1.078                                 | 0.777   | 3.779                                | 0.000   |
| NFKBIA                | IKBA                                             | 1.037                                  | 0.923   | 3.634                                | 0.013   |
| RELA                  | NF-kappa B (p65)                                 | 1.145                                  | 0.426   | 1.948                                | 0.004   |
| IL1R1                 | interleukin 1 receptor type 1                    | -1.295                                 | 0.649   | 1.640                                | 0.522   |
| IL6R                  | interleukin 6 receptor                           | -1.725                                 | 0.185   | -3.111                               | 0.042   |

  

| CYTOKINES    |                                            | UNSTIMULATED CROHN'S SCS vs NORMAL SCS |         | STIMULATED CROHN'S SCS vs NORMAL SCS |         |
|--------------|--------------------------------------------|----------------------------------------|---------|--------------------------------------|---------|
| Symbol       | Gene                                       | Fold Change                            | P value | Fold Change                          | P value |
| IFNA1/IFNA13 | interferon alpha 1, interferon alpha 13    | 25.213                                 | 0.007   | 116.987                              | 0.004   |
| IL-10        | CSIF, interleukin 10, TGIF                 | -4.167                                 | 0.181   | 65.155                               | 0.003   |
| IFN-β1       | IFN-β, IFN-β1, interferon beta 1           | -2.872                                 | 0.482   | 59.696                               | 0.026   |
| IL-8         | C-X-C motif chemokine ligand 8, IL8        | 3.748                                  | 0.390   | 15.642                               | 0.189   |
| IL-23        | IL-23, IL23P19, interleukin 23             | -1.165                                 | 0.747   | 14.913                               | 0.000   |
| IL-4         | BCGF, BCGF-1, BSF-1, IL4e12, interleukin 4 | 2.692                                  | 0.322   | -1.787                               | 0.672   |
| IL-5         | EDF, interleukin 5, TRF                    | 6.883                                  | 0.465   | -15.148                              | 0.442   |

**Supplementary Figure 2. Crohn's SCs are more inflammatory than Normal SCs.**

**a** Cytokine levels in unstimulated 7-day culture supernatants from  $2-4 \times 10^5$  Normal SCs and Crohn's SCs/mL ( $n > 4$ ). **b,c** mRNA or protein expression of IL-8, MMP-3 and MMP-9 before and after 18h exposure to CBir1 flagellin (5  $\mu$ g/mL), LF82 (MOI 1), IL-21 (25 ng/mL) plus TNF (7.5 ng/mL) ( $n > 6$ ). (Mean  $\pm$  SEM; \* $P < 0.05$ , \*\* $P < 0.01$ ). **d** Transcriptomic analysis of key inflammatory response and cytokine genes in the indicated SC populations. Identification of genes up- (red) and down- (green) regulated was based on RNA-Seq data for Ingenuity Pathway Analysis Canonical Pathways and Biological Function/Disease categories in unstimulated and LF82-stimulated Normal and Crohn's disease SCs. For genes to be considered up- or down-regulated, an absolute fold change cutoff of 2.0 was required.

| INFLAMMATORY RESPONSE |                                                    | UNSTIMULATED CROHN'S SCS vs NORMAL SCS |          | STIMULATED CROHN'S SCS vs NORMAL SCS |         |
|-----------------------|----------------------------------------------------|----------------------------------------|----------|--------------------------------------|---------|
| Symbol                | Gene                                               | Fold Change                            | P Value  | Fold Change                          | P Value |
| ALDH1A2               | aldehyde dehydrogenase 1 family member A2          | 23.216                                 | 0.00102  | 17.763                               | 0.0243  |
| DHRS3                 | retinaldehyde reductase                            | 2.31                                   | 0.142    | 7.02                                 | 0.012   |
| CYP2E1                | cytochrome P450 family 2 subfamily E member 1      | 1.488                                  | 0.179    | 1.803                                | 0.144   |
| RARA                  | retinoic acid receptor alpha                       | 1.351                                  | 0.125    | 1.368                                | 0.24    |
| RARG                  | retinoic acid receptor gamma                       | 1.337                                  | 0.0865   | 1.52                                 | 0.0689  |
| FOXO1                 | forkhead box O1                                    | 1.184                                  | 0.499    | 1.459                                | 0.264   |
| CYP2S1                | cytochrome P450 family 2 subfamily S member 1      | 1.153                                  | 0.863    | 1.991                                | 0.54    |
| APC                   | APC regulator of WNT signaling pathway             | 1.114                                  | 0.556    | -1.253                               | 0.368   |
| ALDH1A3               | aldehyde dehydrogenase 1 family member A3          | 1.016                                  | 0.986    | 17.763                               | 0.0243  |
| ADH5                  | alcohol dehydrogenase 5 (class III)                | -1.11                                  | 0.53     | -1.111                               | 0.64    |
| ALDH1A1               | aldehyde dehydrogenase 1 family member A1          | -1.141                                 | 0.811    | -2.632                               | 0.197   |
| RDH10                 | retinol dehydrogenase 10                           | -1.16                                  | 0.759    | 3.418                                | 0.0617  |
| CYP3A5                | cytochrome P450 family 3 subfamily A member 5      | -1.165                                 | 0.407    | 1.19                                 | 0.486   |
| RDH5                  | retinol dehydrogenase 5                            | -1.205                                 | 0.796    | -1.584                               | 0.639   |
| CYP27C1               | cytochrome P450 family 27 subfamily C member 1     | -1.216                                 | 0.8      | -1.88                                | 0.548   |
| CYP1A1                | cytochrome P450 family 1 subfamily A member 1      | -1.267                                 | 0.793    | -2.062                               | 0.558   |
| RDH16                 | retinol dehydrogenase 16                           | -1.305                                 | 0.44     | -1.024                               | 0.962   |
| AHR                   | aryl hydrocarbon receptor                          | -1.352                                 | 0.339    | 1.052                                | 0.906   |
| ALDH8A1               | aldehyde dehydrogenase 8 family member A1          | -1.685                                 | 0.251    | 1.694                                | 0.402   |
| ADH1C                 | alcohol dehydrogenase 1C (class I)                 | -1.797                                 | 0.675    | 21.181                               | 0.157   |
| ADH4                  | alcohol dehydrogenase 4 (class II), pi polypeptide | -2.693                                 | 0.21     | 2.844                                | 0.382   |
| RBP1                  | retinol binding protein 1                          | -3.323                                 | 0.187    | 2.187                                | 0.528   |
| CYP26B1               | cytochrome P450 family 26 subfamily B member 1     | -6.226                                 | 9.92E-12 | -1.996                               | 0.0572  |

**Supplementary Figure 3. Normal SCs and Crohn's SCs impact RA metabolic pathway gene expression.** Transcriptomic analysis of key inflammatory transcripts involved in the RA metabolic pathway in the indicated SC populations. Identification of up (red)- and down (green)- regulated genes was based on RNA-seq data for Ingenuity Pathway Analysis Metabolic Pathway category in unstimulated and LF82 bacteria-stimulated Normal SCs and Crohn's SCs (n=16). For genes to be considered up- or down-regulated, an absolute fold change cutoff of 2.0 was required.

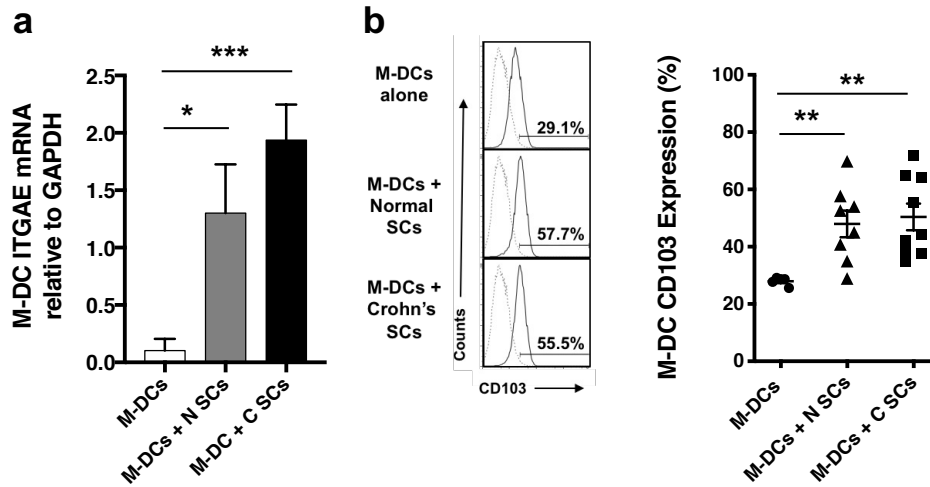

**Supplementary Figure 4. Human intestinal SCs induce expression of CD103 on differentiating mucosal DCs.** CD103 **a** gene (ITGAE) and **b** protein expression profiles and % CD103 expression by M-DCs generated in the presence of GM-CSF and IL-4 in the absence of SCs and the presence of Normal SCs (N SCs) or Crohn's SCs (C SCs) ( $n \geq 7$ ).

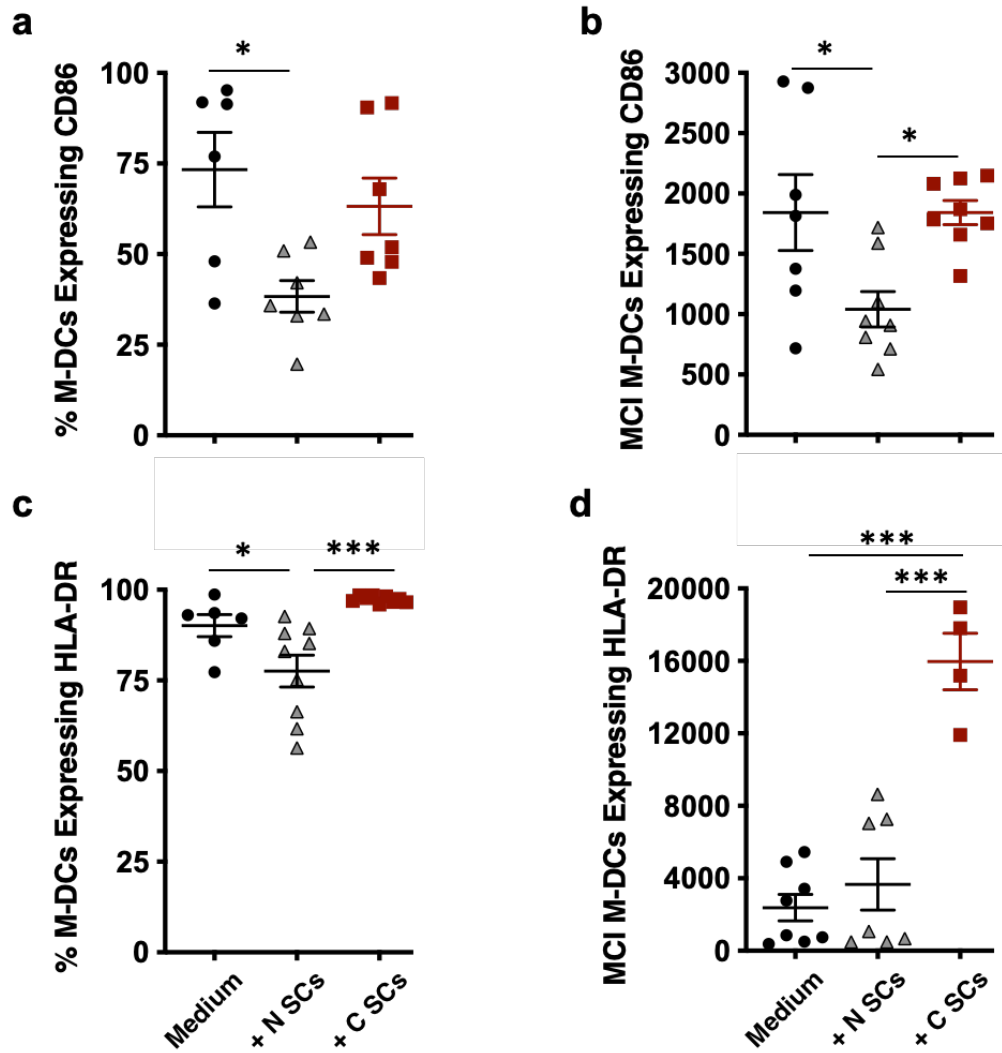

**Supplementary Figure 5. Crohn's SCs drive higher M-DC expression of CD86 and HLA-DR than Normal SCs.** M-DCs generated in the presence of GM-CSF and IL-4 plus media or Normal SCs (N SCs) or Crohn's SCs (C SCs) in the absence of antigen (4 days) and analyzed for % cells that express **a** CD86 and **b** HLA-DR and for mean channel intensity (MCI) of **c** CD86 and **d** HLA-DR (n=4-8).

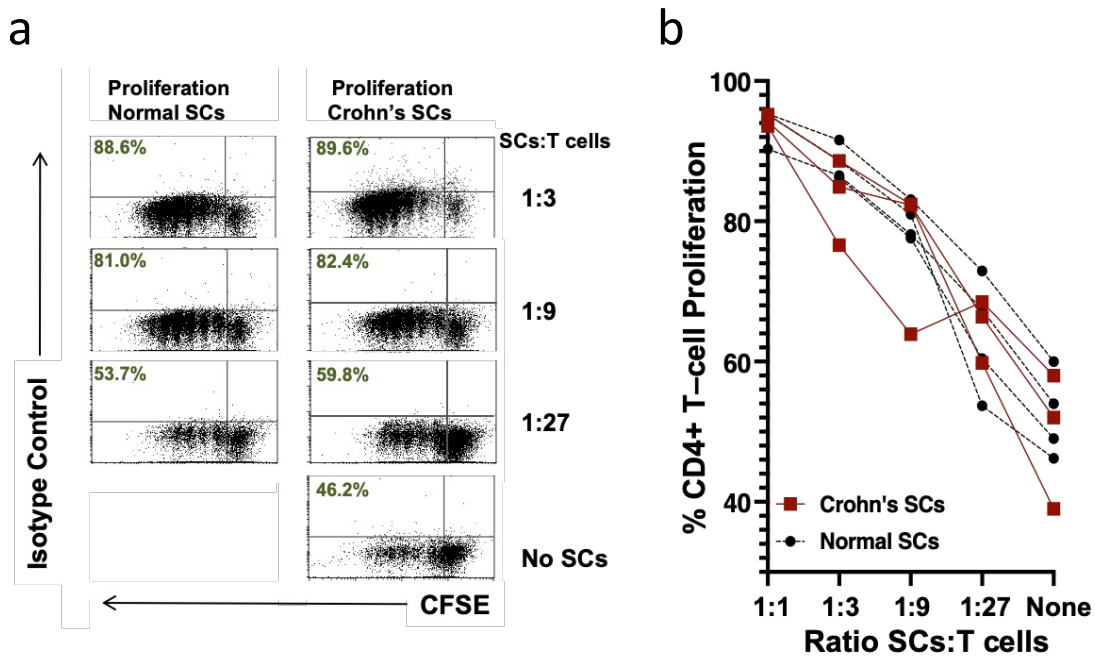

**Supplementary Figure 6. T-cell proliferation is equivalent in Normal SC- and Crohn's SC-T-cell co-cultures.** **a** Proliferation (CFSE) and **b** % proliferation of anti-CD3/CD28 antibody-stimulated CD4<sup>+</sup> T cells co-cultured with medium alone or increasing numbers of Normal SCs or Crohn's SCs from a representative donor or three donors, respectively.
